# Supplementary material for: A connected cytoskeleton network generates axonal tension in embryonic Drosophila
Source: Royal Society of Chemistry journal article supplement (doi:10.1039/c9lc00243j), 2019-01-01
Supplement: c9lc00243j3.pdf [file c9lc00243j3.pdf]

Partial treatment of single axons reveals a connected cytoskeleton  
network in generating axonal tension

**Supplementary Figure**

Anthony Fan<sup>\*1</sup>, Saddam Joy<sup>1</sup>, and Taher Saif<sup>†1</sup>

<sup>1</sup>*Department of Mechanical Science and Engineering, University of Illinois at Urbana-Champaign, Urbana, IL, USA*

July 12, 2019

---

<sup>\*</sup>corresponding author: yungfan2@illinois.edu

<sup>†</sup>corresponding author: saif@illinois.edu

Figure S1

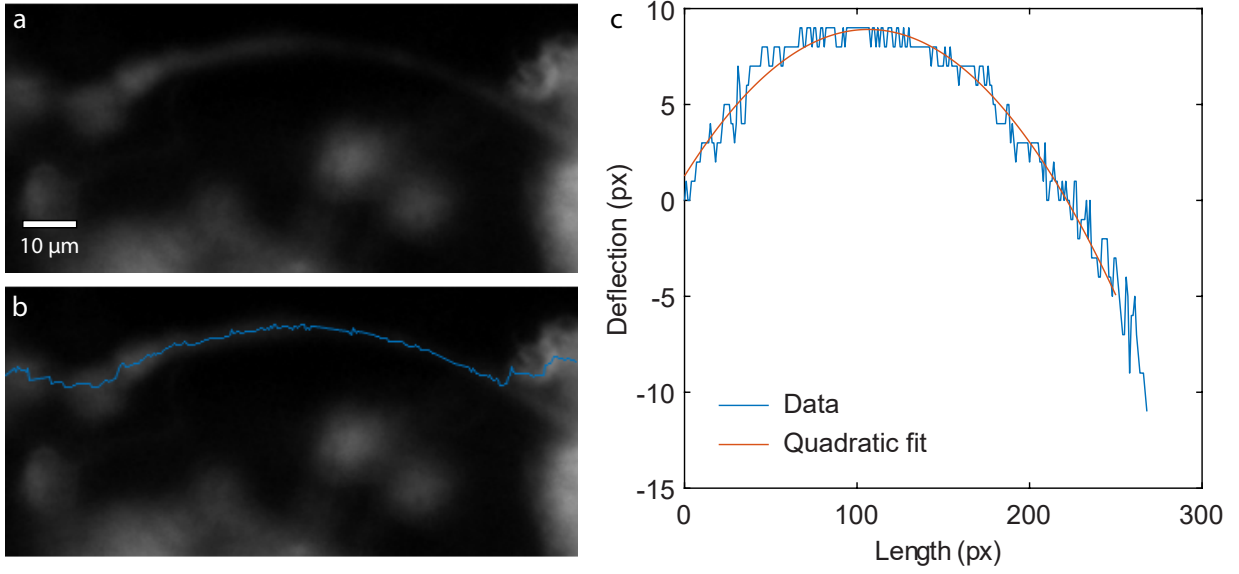

An axon (a) before and (b) after image analysis. The blue line in b traces the profile of the axon. (c) An obtained axon profile is translated such that the point closest to the CNS is at the origin. The profile is fitted to a quadratic function and the coefficients  $A$  and  $B$  in Eq. 9 (main text) is obtained.

Figure S2

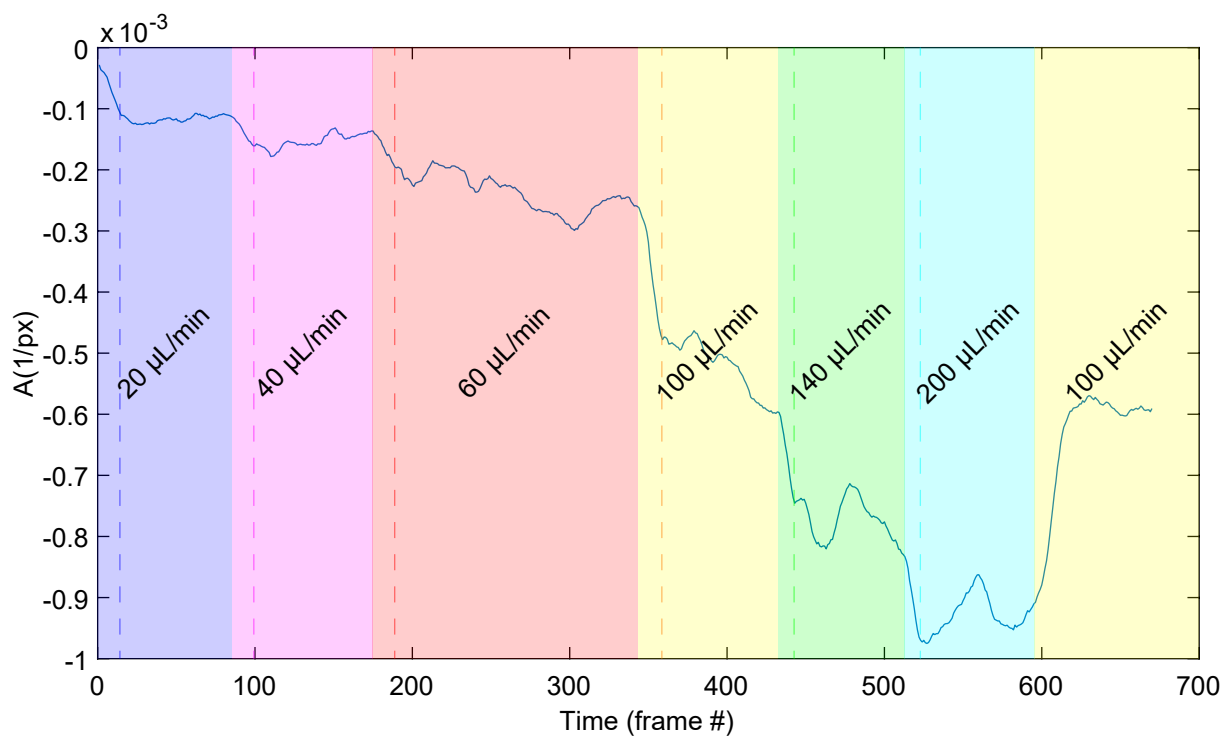

A sample profile of the coefficient  $A$  under the influence of increasing flow rate from 20 to 100  $\mu\text{L}/\text{min}$ . The dotted line in each region indicates the immediate elastic response after the increased load.

Figure S3

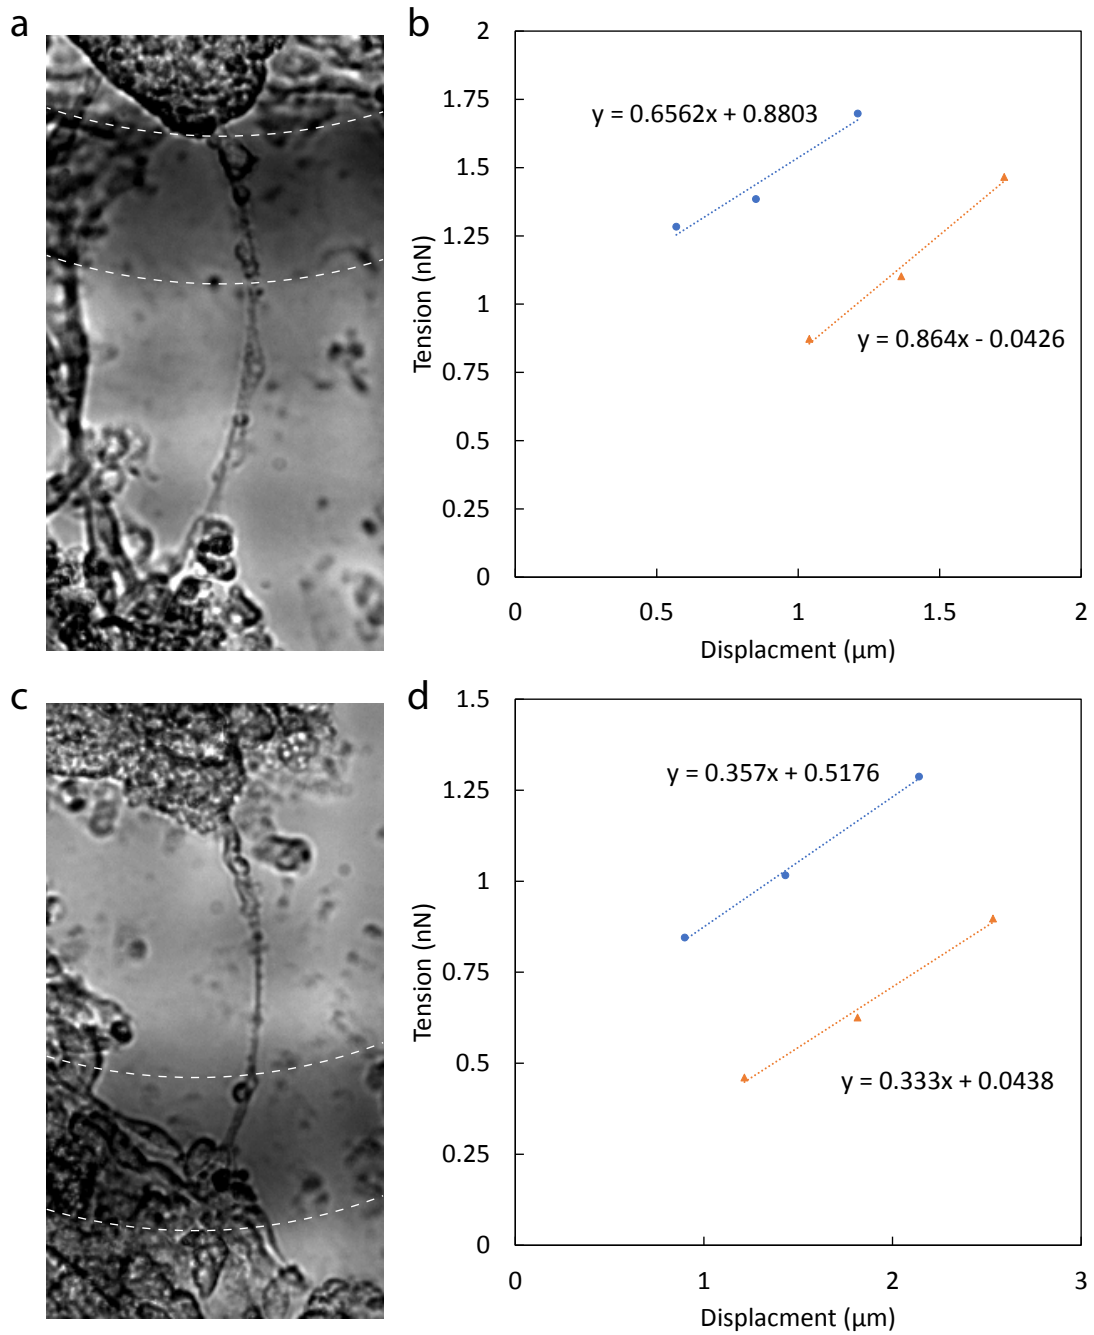

Y-27632 flow applied to an axon towards (a) the CNS side or (c) the NMJ side. (b & d) Respective tension-stretch curves of the axons under partial treatment (red) and subsequent pbs washout (blue). Total rest tension loss is observed in both cases.
